# Supplementary material
Source: ML conference proceedings conference paper supplement (https://openaccess.thecvf.com/content/ICCV2021/html/Ren_PIRenderer_Controllable_Portrait_ICCV_2021_paper.html)
Supplement: Supplementary file 2 [file Ren_PIRenderer_Controllable_Portrait_ICCV_2021_supplemental.zip]

Archive with 8 entries (7 files):
- 01996-supp/
- __MACOSX/._01996-supp
- 01996-supp/.DS_Store
- __MACOSX/01996-supp/._.DS_Store
- 01996-supp/01996-supp.pdf
- __MACOSX/01996-supp/._01996-supp.pdf
- 01996-supp/01996-supp.mp4
- __MACOSX/01996-supp/._01996-supp.mp4
